# Supplementary material for: Food insecurity impacts healthy lifestyle practices and medication adherence among persons with hypertension in Colombia and Jamaica: Findings from a cross-sectional study
Source: Research Square preprint supplement (doi:10.21203/rs.3.rs-8135598/v1), 2025-12-09
Supplement: Supplementary file 1 [file 7b5c89fa7e6c5c42298f4499.docx]

# Supplement 2

| **Supplement Table 1: The baseline characteristics of all participants in the CATCH Study*** | | | | |
| --- | --- | --- | --- | --- |
| **Characteristics** | **Jamaica**  **(n=288)** | **Colombia**  **(n=288)** | **Both**  **(n=576)** | **P-Value**  **Group Difference** |
| **Demographic Characteristics** |  |  |  |  |
| **Age, *Mean (SD)*** | 62.5 (10.2) | 66.5 (12.2) | 64.6 (11.4) | <0.001 |
| **Sex, *n (%)*** |  |  |  | 0.217 |
| Male | 130 (34.4) | 144 (28.9) | 274 (31.5) |  |
| Female | 158 (65.6) | 144 (71.1) | 302 (68.5) |  |
| **Location, *n (%)*** |  |  |  | 0.367 |
| Urban | 146 (66.0) | 144 (69.9) | 290 (68.1) |  |
| Rural | 142 (34.0) | 144 (30.1) | 286 (31.9) |  |
| **Marital Status, *n (%)*** |  |  |  | <0.001 |
| Married/Common Law | 130 (40.6) | 193 (58.9) | 323 (50.3) |  |
| Not Married (Single, widowed, divorced, other) | 158 (59.4) | 95 (41.1) | 253 (49.7) |  |
| **Education Level, *n (%)*** |  |  |  | 0.011 |
| Less than High school | 121 (43.2) | 94 (33.2) | 215 (37.9) |  |
| High School | 121 (39.6) | 106 (36.5) | 227 (37.9) |  |
| More than High school | 46 (17.2) | 88 (30.3) | 134 (24.1) |  |
| **Employment status, *n (%)*** |  |  |  | 0.014 |
| Employed/Retiree | 214 (76.1) | 197 (64.0) | 411 (69.7) |  |
| **Other | 74 (23.9) | 91 (36.0) | 165 (30.3) |  |
| **Hypertension Characteristics, *n (%)*** |  |  |  |  |
| Duration years, *mean (SD)* | 16.5 (11.5) | 11.1 (11.9) | 13.6 (12.0) | <0.001 |
| Had hypertension > 5 years, *n (%)* | 236 (84.8) | 177 (60.6) | 413 (71.9) | <0.001 |
| Currently on Antihypertensive Medications *n (%)* | 281 (96.6) | 283 (99.8) | 564 (98.3) | 0.085† |
| **Comorbidities, *n (%)*** |  |  |  |  |
| Diabetes | 116 (38.3) | 52 (15.9) | 168 (26.4) | <0.001 |
| High cholesterol | 159 (58.9) | 129 (47.1) | 288 (52.7) | 0.029 |
| Depression | 9 (3.1) | 22 (7.3) | 31 (5.3) | 0.064 |
| Anxiety | 10 (3.7) | 19 (6.1) | 29 (5.0) | 0.287 |
| Kidney Disease | 4 (1.1) | 14 (5.8) | 18 (3.6) | <0.001† |
| Stroke | 25 (7.7) | 5 (2.5) | 30 (4.9) | <0.001† |
| Heart Attack/Heart Disease | 8 (2.7) | 28 (9.1) | 36 (6.1) | 0.008 |
| Overweight/Obesity | 98 (31.9) | 171 (52.7) | 269 (42.9) | <0.001 |
| **Multimorbidity, *n (%)*** |  |  |  | 0.053 |
| Yes (≥2 conditions) | 142 (49.5) | 127 (39.2) | 269 (44.1) |  |
| No | 146 (50.5) | 161 (60.8) | 307 (55.9) |  |
| **Health Care financing, *n (%)*** |  |  |  | <0.001 |
| Private Insurance | 23 (7.6) | 243 (88.3) | 266 (50.4) |  |
| No private insurance*** | 265 (92.4) | 45 (11.7) | 310 (49.6) |  |
| **Food Insecurity, *n (%)*** |  |  |  | <0.001 |
| Yes (Insecurity) | 260 (89.0) | 180 (64.6) | 440 (76.1) |  |
| No (Security) | 28 (11.0) | 108 (35.4) | 136 (23.9) |  |
| **Medication adherence, *n (%)*** |  |  |  | <0.001 |
| Low/medium | 138 (49.3) | 41 (11.8) | 179 (29.3) |  |
| High | 143 (50.7) | 242 (88.2) | 385 (70.7) |  |
| **Lifestyle Factors, *n (%)*** |  |  |  |  |
| Eat less salt | 278 (96.3) | 276 (97.2) | 554 (96.8) | 0.551 |
| Exercising regularly | 142 (45.8) | 171 (53.8) | 313 (50.0) | 0.137 |
| Decrease/don’t consume alcohol | 286 (99.1) | 283 (98.0) | 569 (98.5) | 0.147† |
| Eat ≥ 2 servings of fruits | 61 (22.3) | 203 (72.1) | 264 (48.7) | <0.001 |
| Eat ≥ 3 servings of vegetables | 27 (9.8) | 217 (73.1) | 244 (43.3) | <0.001 |
| **Lifestyle adherence, *n (%)*** |  |  |  | <0.001 |
| Unfavourable (≤ 3) | 150 (52.8) | 46 (13.8) | 196 (32.1) |  |
| Favourable (4-6) | 138 (47.2) | 242 (86.2) | 380 (67.9) |  |
| **Covid -19 Impact, *n (%)*** |  |  |  | <0.001 |
| Minimal | 250 (86.5) | 85 (29.8) | 335 (56.4) |  |
| Moderate/ Substantial | 38 (13.5) | 203 (70.2) | 241 (43.6) |  |
| * The sample sizes and actual frequency numbers are unweighted but means (SDs) or percentages are weighted.  ** unemployed, housewife, student, disabled  *** no private insurance- meaning government, self, family friends and charity  † Fisher's exact test | | | | |

| **Supplement Table 2: Baseline characteristics among All CATCH participants by Education*** | | | | |
| --- | --- | --- | --- | --- |
| **Characteristics** | **Less than Highschool  (N=215)** | **Highschool  (N=227)** | **More than Highschool (N=134)** | **P-value for Group Difference** |
| **Demographic Characteristics** |  |  |  |  |
| **Age, mean (SD)** | 69.5 (9.8) | 62.2 (10.5) | 60.6 (12.3) | <0.001 |
| **Sex, *n (%)*** |  |  |  | 0.028 |
| Male | 119 (38.9) | 98 (25.3) | 57 (29.5) |  |
| Female | 96 (61.1) | 129 (74.7) | 77 (70.5) |  |
| **Country, *n (%)*** |  |  |  | 0.011 |
| Colombia | 94 (46.5) | 106 (51.0) | 88 (66.5) |  |
| Jamaica | 121 (53.5) | 121 (49.0) | 46 (33.5) |  |
| **Location, *n (%)*** |  |  |  | <0.001 |
| Urban | 83 (56.0) | 110 (69.2) | 97 (85.2) |  |
| Rural | 132 (44.0) | 117 (30.8) | 37 (14.8) |  |
| **Marital Status, *n (%)*** |  |  |  | 0.133 |
| Married/ Common Law | 111 (43.4) | 127 (53.5) | 85 (56.1) |  |
| Not Married (Never, widowed, divorced, other) | 104 (56.6) | 100 (46.5) | 49 (43.9) |  |
| **Employment status, *n (%)*** |  |  |  | 0.005 |
| Employed/Retiree | 146 (65.7) | 152 (65.4) | 113 (82.8) |  |
| **Other | 69 (34.3) | 75 (34.6) | 21 (17.2) |  |
| **Hypertension Characteristics** |  |  |  |  |
| Duration of hypertension, mean (SD) | 13.6 (12.5) | 14.1 (12.3) | 12.9 (10.7) | 0.806 |
| Had hypertension ≥ 5 years, *n (%)* | 153 (69.4) | 162 (73.6) | 98 (73.3) | 0.739 |
| Currently on Antihypertensive Medications, *n (%)* | 210 (98.5) | 224 (99.2) | 130 (96.4) | 0.198† |
| **Comorbidities, *n (%)*** |  |  |  |  |
| Diabetes | 63 (24.7) | 71 (26.4) | 34 (29.2) | 0.770 |
| High cholesterol | 111 (55.4) | 118 (51.2) | 59 (50.6) | 0.727 |
| Depression | 12 (4.3) | 12 (6.7) | 7 (4.7) | 0.690 |
| Anxiety | 8 (3.1) | 13 (7.3) | 8 (4.5) | 0.320 |
| Kidney Disease | 6 (1.7) | 9 (6.2) | 3 (2.3) | 0.023† |
| Stroke | 15 (5.9) | 11 (4.0) | 4 (4.8) | 0.355† |
| Heart Attack/Heart Disease | 14 (6.1) | 11 (4.9) | 11 (7.9) | 0.673 |
| Overweight/Obesity | 82 (36.6) | 110 (43.8) | 77 (51.5) | 0.092 |
| **Multimorbidity, *n (%)*** |  |  |  | 0.528 |
| Yes (≥2 conditions) | 96 (40.7) | 109 (44.6) | 64 (48.5) |  |
| No | 119 (59.3) | 118 (55.4) | 70 (51.5) |  |
| **Health Care Expenses, *n (%)*** |  |  |  | <0.001 |
| Private Insurance | 76 (39.9) | 96 (48.7) | 94 (69.8) |  |
| ***No private insurance | 139 (60.1) | 131 (51.3) | 40 (30.2) |  |
| **Food Insecurity, *n (%)*** |  |  |  | <0.001 |
| Yes (Insecurity) | 185 (84.7) | 182 (79.0) | 73 (57.8) |  |
| No (Security) | 30 (15.3) | 45 (21.0) | 61 (42.2) |  |
| **Medication Adherence, *n (%)*** |  |  |  | 0.817 |
| Low/medium | 62 (28.5) | 78 (31.1) | 39 (27.7) |  |
| High | 148 (71.5) | 146 (68.9) | 91 (72.3) |  |
| **Lifestyle Factors, *n (%)*** |  |  |  |  |
| Eat less salt | 209 (96.1) | 215 (96.6) | 130 (98.1) | 0.577† |
| Exercising regularly | 120 (49.5) | 111 (44.7) | 82 (59.3) | 0.114 |
| Decrease/don’t consume alcohol | 212 (97.8) | 225 (99.1) | 132 (98.8) | 0.533† |
| Eat ≥ 2 servings of fruits | 91 (44.4) | 98 (48.8) | 75 (55.5) | 0.286 |
| Eat ≥ servings of vegetables | 80 (39.6) | 91 (41.0) | 73 (53.0) | 0.125 |
| **Lifestyle adherence, *n (%)*** |  |  |  | 0.067 |
| Unfavourable (≤ 3) | 72 (34.8) | 88 (35.5) | 36 (22.7) |  |
| Favourable (4-6) | 143 (65.2) | 139 (64.5) | 98 (77.3) |  |
| **Covid -19 Impact, *n (%)*** |  |  |  | 0.406 |
| Minimal | 126 (56.8) | 140 (59.8) | 69 (50.3) |  |
| Moderate/Substantial | 89 (43.2) | 87 (40.2) | 65 (49.7) |  |
| * The sample sizes and actual frequency numbers are unweighted but means (SDs) or percentages are weighted.  ** unemployed, housewife, student, disabled  *** no private insurance- meaning government, self, family friends and charity  Wald Chi-square test for categorical variable difference between Jamaica and Colombia  † Fisher's exact test method, weights are round up to the nearest non-zero integer for test | | | | |

| **Supplement Table 3: Baseline characteristics among All CATCH participants by Employment Status*** | | | |
| --- | --- | --- | --- |
| **Characteristics** | **Employed/**  **Retiree (N=411)** | **Other** (N=165)** | **P-value for Group Difference** |
| **Demographic Characteristics** |  |  |  |
| **Age, *mean (SD)*** | 64.3 (11.3) | 65.3 (11.5) | 0.463 |
| **Sex, *n (%)*** |  |  | <0.001 |
| Male | 221 (37.0) | 53 (18.9) |  |
| Female | 190 (63.0) | 112 (81.1) |  |
| **Country, *n (%)*** |  |  | 0.014 |
| Colombia | 197 (48.8) | 91 (63.0) |  |
| Jamaica | 214 (51.2) | 74 (37.0) |  |
| **Location, *n (%)*** |  |  | 0.015 |
| Urban | 219 (71.8) | 71 (59.5) |  |
| Rural | 192 (28.2) | 94 (40.5) |  |
| **Marital Status, *n (%)*** |  |  | 0.974 |
| Married/ Common Law | 234 (50.4) | 89 (50.2) |  |
| Not Married (Never, widowed, divorced, other) | 177 (49.6) | 76 (49.8) |  |
| **Education Category, *n (%)*** |  |  | 0.005 |
| Less than Highschool | 146 (35.7) | 69 (42.9) |  |
| Highschool | 152 (35.6) | 75 (43.4) |  |
| More than Highschool | 113 (28.7) | 21 (13.7) |  |
| **Hypertension Characteristics** |  |  |  |
| Duration of hypertension, mean *(SD)* | 13.0 (11.3) | 15.1 (13.6) | 0.244 |
| Had hypertension ≥ 5 years, *n (%)* | 294 (71.9) | 119 (71.9) | 0.990 |
| Currently on Antihypertensive Medications | 403 (98.4) | 161 (97.9) | 0.571† |
| **Comorbidities, *n (%)*** |  |  |  |
| Diabetes | 120 (25.7) | 48 (28.2) | 0.623 |
| High cholesterol | 212 (55.9) | 76 (45.1) | 0.071 |
| Depression | 22 (5.7) | 9 (4.4) | 0.582 |
| Anxiety | 19 (4.9) | 10 (5.4) | 0.825 |
| Kidney Disease | 10 (2.0) | 8 (7.1) | 0.172 |
| Stroke | 15 (3.9) | 15 (7.2) | 0.187 |
| Heart Attack/Heart Disease | 26 (5.6) | 10 (7.2) | 0.628 |
| Overweight/Obesity | 189 (41.1) | 80 (47.1) | 0.313 |
| **Multimorbidity, *n (%)*** |  |  | 0.748 |
| Yes (≥2 conditions) | 189 (43.5) | 80 (45.4) |  |
| No | 222 (56.5) | 85 (54.6) |  |
| **Health Care Expenses, *n (%)*** |  |  | 0.387 |
| Private Insurance | 208 (52.0) | 58 (46.8) |  |
| ***No private insurance | 203 (48.0) | 107 (53.2) |  |
| **Food Insecurity, *n (%)*** |  |  | 0.176 |
| Yes (Insecurity) | 298 (73.9) | 142 (81.1) |  |
| No (Security) | 113 (26.1) | 23 (18.9) |  |
| **Medication Adherence Score, *n (%)*** |  |  | 0.088 |
| Low/medium | 138 (31.9) | 41 (23.4) |  |
| High | 265 (68.1) | 120 (76.6) |  |
| **Lifestyle Factors, *n (%)*** |  |  |  |
| Eat less salt | 394 (96.6) | 160 (97.2) | 0.743 |
| Exercising regularly | 237 (52.6) | 76 (44.2) | 0.163 |
| Decrease/don’t consume alcohol | 406 (98.4) | 163 (98.8) | >0.999† |
| Eat ≥ 2 servings of fruits | 191 (47.6) | 73 (51.3) | 0.545 |
| Eat ≥ 3 servings of vegetables | 166 (37.9) | 78 (56.0) | 0.003 |
| **Lifestyle adherence, *n (%)*** |  |  | 0.097 |
| Unfavourable (≤ 3) | 145 (34.7) | 51 (26.2) |  |
| Favourable (4-6) | 266 (65.3) | 114 (73.8) |  |
| **Covid -19 Impact, *n (%)*** |  |  | 0.005 |
| Minimal | 253 (61.6) | 82 (44.3) |  |
| Moderate/Substantial | 158 (38.4) | 83 (55.7) |  |
| * The sample sizes and actual frequency numbers are unweighted but means (SDs) or percentages are weighted.  ** unemployed, housewife, student, disabled  *** no private insurance- meaning government, self, family friends and charity  Wald Chi-square test for categorical variable difference between Jamaica and Colombia  † Fisher's exact test method, weights are round up to the nearest non-zero integer for test | | | |

| **Supplement Table 4: Medication adherence by sociodemographic characteristics and food insecurity in Colombia and Jamaica*** | | | |
| --- | --- | --- | --- |
| **Characteristics** | **High Adherence (N=385)** | **Medium + Low adherence (N=179)** | ***P*-value** |
| **Demographic Characteristics** |  |  |  |
| **Age, *mean (SD)*** | 65.9 (11.5) | 60.9 (10.5) | <0.001 |
| **Sex, *n (%)*** |  |  | 0.551 |
| Male | 190 (32.1) | 76 (29.4) |  |
| Female | 195 (67.9) | 103 (70.6) |  |
| **Location *n (%)*** |  |  | 0.411 |
| Urban | 194 (68.6) | 89 (64.7) |  |
| Rural | 191 (31.4) | 90 (35.3) |  |
| **Education level, *n (%)*** |  |  | 0.817 |
| Less than High school | 148 (38.9) | 62 (37.4) |  |
| Highschool | 146 (37.7) | 78 (41.0) |  |
| More than High school | 91 (23.5) | 39 (21.6) |  |
| **Employment Status, *n (%)*** |  |  | 0.088 |
| Employed/Retiree | 265 (67.0) | 138 (75.7) |  |
| Other ** | 120 (33.0) | 41 (24.3) |  |
| **Hypertension Characteristics** |  |  |  |
| Duration years, *mean (SD)* | 13.0 (12.3) | 14.5 (10.9) | 0.271 |
| Had hypertension ≥ 5 years, *n (%)* | 266 (69.1) | 138 (77.3) | 0.102 |
| **Multimorbidity, *n (%)*** |  |  | 0.553 |
| Yes (≥2 conditions) | 182 (42.6) | 83 (46.0) |  |
| No | 203 (57.4) | 96 (54.0) |  |
| **Healthcare financing, *n (%)*** |  |  | <0.001 |
| Private Insurance, | 220 (62.2) | 41 (22.7) |  |
| No private insurance*** | 165 (37.8) | 138 (77.3) |  |
| **Food Insecurity, *n (%)*** |  |  | <0.001 |
| Yes (Insecure) | 276 (70.6) | 156 (88.2) |  |
| No (Secure) | 109 (29.4) | 23 (11.8) |  |
| **Lifestyle adherence, *n (%)*** |  |  | <0.001 |
| Unfavourable | 100 (25.5) | 91 (47.7) |  |
| Favourable | 285 (74.5) | 88 (52.3) |  |
| **Covid -19 Impact, *n (%)*** |  |  | <0.001 |
| Minimal | 197 (48.5) | 129 (72.4) |  |
| Moderate/Substantial | 188 (51.5) | 50 (27.6) |  |
| * The sample sizes and actual frequency numbers are unweighted but means (SDs) or percentages are weighted.  ** unemployed, housewife, student, disabled  *** no private insurance- meaning government, self, family friends and charity | | | |

| **Supplement Table 5: Lifestyle-adherence by socio-demographic characteristics and food insecurity in Colombia and Jamaica*** | | | |
| --- | --- | --- | --- |
| **Characteristics** | **Favourable Lifestyle Adherence (N=380)** | **Unfavourable Lifestyle adherence (N=196)** | ***P*-value** |
| **Demographic Characteristics** |  |  |  |
| **Age, *mean (95% CI)*** | 65.4 (11.6) | 63.0 (10.7) | 0.067 |
| **Sex, *n (%)*** |  |  | 0.436 |
| Male | 180 (30.3) | 94 (34.0) |  |
| Female | 200 (69.7) | 102 (66.0) |  |
| **Location, *n (%)*** |  |  | 0.220 |
| Urban | 196 (69.9) | 94 (64.2) |  |
| Rural | 184 (30.1) | 102 (35.8) |  |
| **Marital Status, *n (%)*** |  |  | 0.745 |
| Married/Common Law | 223 (50.9) | 100 (49.0) |  |
| Not Married (Single, widowed, divorced, other) | 157 (49.1) | 96 (51.0) |  |
| **Education level, *n (%)*** |  |  | 0.067 |
| Less than High school | 143 (36.4) | 72 (41.1) |  |
| Highschool | 139 (36.1) | 88 (41.9) |  |
| More than High school | 98 (27.5) | 36 (17.0) |  |
| **Employment Status, *n (%)*** |  |  | 0.097 |
| Employed/retired | 266 (67.1) | 145 (75.2) |  |
| Other ** | 114 (32.9) | 51 (24.8) |  |
| **Hypertension Characteristics** |  |  |  |
| Duration years, *mean (SD)* | 13.4 (12.4) | 14.1 (11.3) | 0.622 |
| Had hypertension ≥ 5 years, *n (%)* | 264 (69.5) | 149 (77.0) | 0.140 |
| **Multimorbidity, *n (%)*** |  |  | 0.036 |
| Yes (≥2 conditions) | 169 (40.3) | 100 (52.2) |  |
| No | 211 (59.7) | 96 (47.8) |  |
| **Health Care Expenses, *n (%)*** |  |  | <0.001 |
| Private Insurance | 216 (62.1) | 50 (25.8) |  |
| No private insurance *** | 164 (37.9) | 146 (74.2) |  |
| **Food Insecurity, *n (%)*** |  |  | <0.001 |
| Yes | 266 (69.1) | 174 (90.8) |  |
| No | 114 (30.9) | 22 (9.2) |  |
| **Medication adherence, *n (%)*** |  |  | <0.001 |
| Low/medium | 88 (22.6) | 91 (43.6) |  |
| High | 285 (77.4) | 100 (56.4) |  |
| **Covid -19 Impact, *n (%)*** |  |  | <0.001 |
| Minimal | 184 (45.6) | 151 (79.2) |  |
| Moderate/Substantial | 196 (54.4) | 45 (20.8) |  |
| * The sample sizes and actual frequency numbers are unweighted but means (SDs) or percentages are weighted.  ** unemployed, housewife, student, disabled  *** no private insurance- meaning government, self, family friends and charity  † Fisher's exact test | | | |
